# Supplementary material
Source: Royal Society of Chemistry journal article supplement (doi:10.1039/d6dt00603e)
Supplement: d6dt00603e1.pdf [file d6dt00603e1.pdf]

## SUPPLEMENTARY INFORMATION

### Luminescence of BaFBr Nanoplates Codoped with Eu<sup>2+/3+</sup>

Nishani T. Manamperi, S. Sameera Perera, and Federico A. Rabuffetti\*

Department of Chemistry, Wayne State University, Detroit, MI 48202, USA

\*Corresponding Author. Email: [far@chem.wayne.edu](mailto:far@chem.wayne.edu)

**Table S1.** Refined Structural Parameters of BaFBr:Eu<sup>2+/3+</sup>

|                            |                              |
|----------------------------|------------------------------|
| <i>a</i> (Å)               | 4.4977(5)                    |
| <i>c</i> (Å)               | 7.4918(16)                   |
| <i>V</i> (Å <sup>3</sup> ) | 151.55(5)                    |
| <i>z</i> Ba                | 0.1944(4)                    |
| <i>z</i> Br                | 0.6474(7)                    |
| Ba–F (Å)                   | 2.6793(17) (×4)              |
| Ba–Br (Å)                  | 3.394(3) (×4), 3.394(7) (×1) |

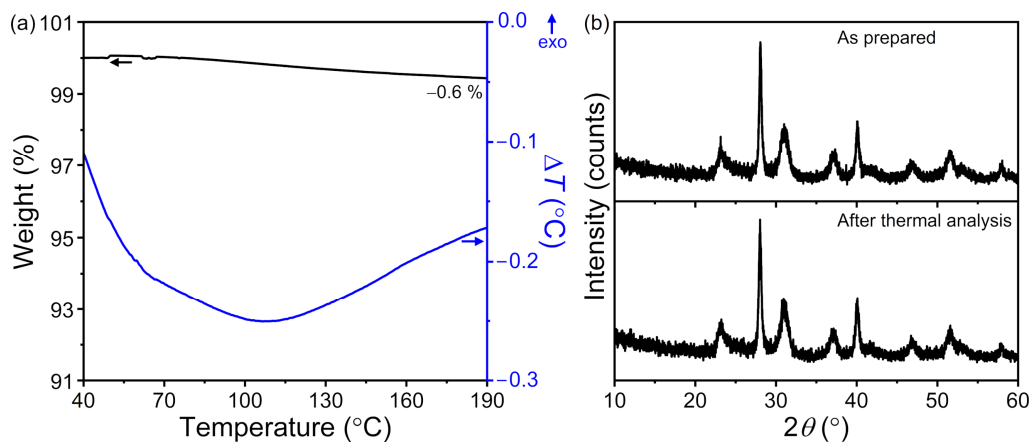

**Figure S1.** (a) Thermogravimetric (TGA) and differential thermal analysis (DTA) of BaFBr:Eu<sup>2+/3+</sup>. Total weight loss is indicated. (b) PXRD patterns of BaFBr:Eu<sup>2+/3+</sup> before and after thermal analysis. Thermal analysis was conducted under flowing nitrogen (100 mL min<sup>-1</sup>) using an SDT2960 TGA–DTA analyzer (TA Instruments). ≈10 mg of sample were placed in an alumina crucible, held at 35 °C for 10 min, ramped to 190 °C at a rate of 10 °C min<sup>-1</sup>, and kept at that temperature for 5 min. PXRD patterns were collected in the 10–60° *2θ* range using a step size and time of 0.012° and 0.3 s, respectively.

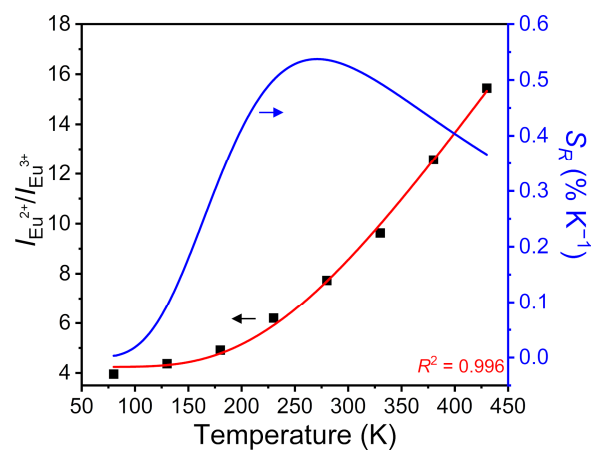

**Figure S2.** Temperature dependence of the ratio between the integrated intensities of the  $4f^65d^1$  ( ${}^1I$ )  $\rightarrow$   $4f^7$  and  ${}^5D_0 \rightarrow$   ${}^7F_2$  emission bands of  $Eu^{2+}$  and  $Eu^{3+}$  in  $BaFBr:Eu^{2+/3+}$ , respectively. An exponential function of the type  $A + B \exp(-C/T)$  (solid red curve) was fit to experimental ratios (solid black squares), yielding  $A = 4.24(16)$ ,  $B = 97.8(12.6)$ , and  $C = 936(55)$  K as fit parameters and  $R^2 = 0.996$  as fit residual. This function was used to compute the relative temperature sensitivity  $S_R$  (solid blue curve).

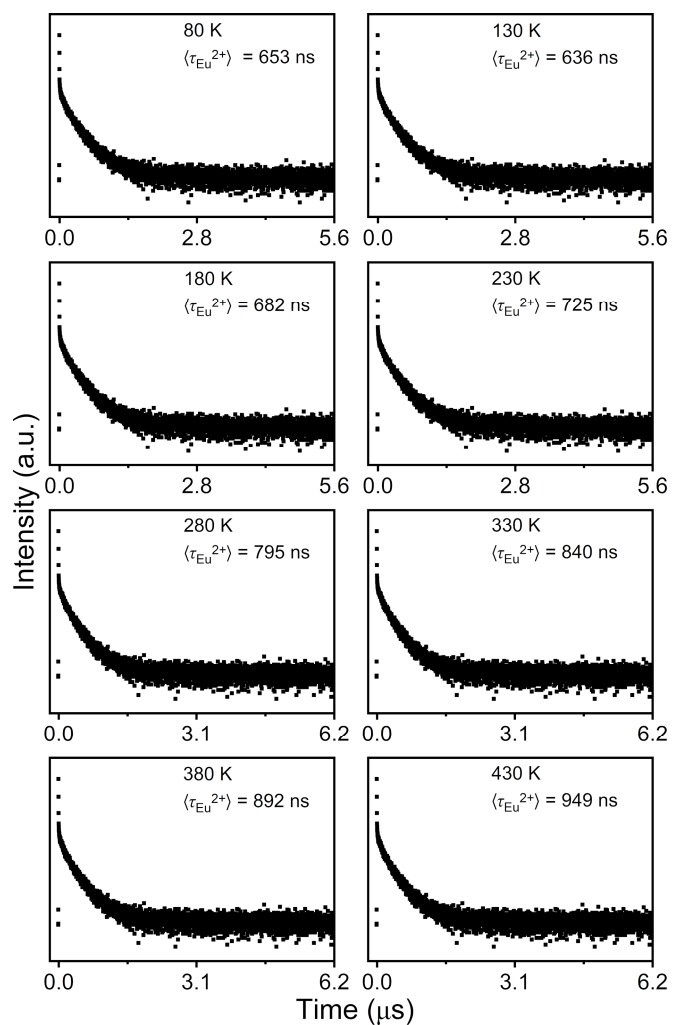

**Figure S3.** Variable-temperature luminescence decays of  $\text{Eu}^{2+}$  in  $\text{BaFBr:Eu}^{2+/3+}$ . Decays were excited at 260 nm and monitored at 392 nm. Intensity-weighted average lifetimes ( $\langle\tau_{\text{Eu}^{2+}}\rangle$ ) are given. Decays are plotted in logarithmic scale.
